# Supplementary material for: The ulcerative colitis narrative Greece survey: patients’ and physicians’ perspective on quality of life and disease management
Source: PubMed Central journal article supplement — Ann Gastroenterol. 2022 Mar 25;35(3):267–74. doi: 10.20524/aog.2022.0708 (PMC9062848; doi:10.20524/aog.2022.0708), 2022-03-25
Supplement: AnnGastroenterol-35-267_Suppl1.pdf [file AnnGastroenterol-35-267_Suppl1.pdf]

## Supplementary material

### Supplementary material 1

UC Narrative Patient Survey  
Greece

---

#### SECTION 600: SCREENER

---

**BASE: ALL RESPONDENTS**

**Q264** Thank you for agreeing to take this survey. Our first few questions are for classification purposes and will help us determine which questions to ask you later in the survey. They will also help us properly analyze responses to this survey. As you may already know, we never disclose the identity of any individual. Your answers will always be kept strictly confidential. We report results only for groups of people, not for individuals.

In which country or region do you currently reside?  
[STANDARD LIST OF COUNTRIES]

Choice:

[ch14] Australia  
[ch33] Brazil  
[ch42] Canada  
[ch48] China  
[ch75] Finland  
[ch76] France  
[ch85] Germany  
[ch89] Greece  
[ch116] India  
[ch120] Ireland  
[ch123] Italy  
[ch126] Japan  
[ch157] Mexico  
[ch196] Russian Federation  
[ch214] South Korea  
[ch215] Spain  
[ch223] Sweden  
[ch224] Switzerland  
[ch243] United Kingdom  
[ch244] United States of America  
[ch996] Other country

**BASE: ALL RESPONDENTS**

**Q601** What is your sex assigned at birth (what the doctor put on your birth certificate)?

Male  
Female

**BASE: ALL RESPONDENTS**

**Q271** In what month were you born?

January  
February  
March  
April  
May  
June

July  
August  
September  
October  
November  
December

**BASE: ALL RESPONDENTS**

**Q270** In what year were you born? Please enter your response as a four-digit number (for example, 1977).  
[RANGE: 1900 to CURRENT YEAR-2016]  
|\_|\_|\_|\_|

**BASE: ALL RESPONDENTS**

**Q700** How would you describe your current overall health?  
Poor  
Fair  
Good  
Excellent

**BASE: ALL RESPONDENTS**

**Q600** Have you personally been told by a doctor that you have any of the following health conditions? Please select all that apply.

[MULTIPLE RESPONSE]

Anxiety  
Arthritis  
Psoriasis  
Celiac disease  
Chronic constipation  
Crohn's disease  
Depression  
Diabetes  
Eczema  
Irritable bowel syndrome (IBS)  
Ulcerative colitis [MUST SELECT TO CONTINUE]  
Chronic anemia  
Other inflammatory disease [ANCHOR]  
None of these [ANCHOR]

**BASE: HAVE BEEN TOLD THEY HAVE UC**

**Q601** To the best of your knowledge do you have a family history of inflammatory bowel disease (IBD), such as Crohn's disease or ulcerative colitis (UC)?

Yes  
No  
Not sure

**BASE: HAVE BEEN TOLD THEY HAVE UC**

**Q605** You indicated that you have been told by a doctor that you have ulcerative colitis. We would now like to ask you a few questions about your experiences with **ulcerative colitis (UC)**. Did you have an endoscopic

procedure (i.e., a colonoscopy (a scope) or flexible sigmoidoscopy) in order to confirm your diagnosis of UC?

Throughout the remainder of the survey, when we say UC, please think about your experiences with ulcerative colitis.

Yes

No [TERMINATE]

Not sure [TERMINATE]

**BASE: HAVE BEEN TOLD THEY HAVE UC**

**Q606** How old were you when you first experienced UC symptoms? If you experienced symptoms before age one, please put 0.

\_\_\_\_ years old [RANGE = 1 – AGE AT Q270]

**BASE: HAVE BEEN TOLD THEY HAVE UC**

**Q607** How old were you when you were first diagnosed with UC by a doctor? If you were diagnosed before age one, please put 0.

\_\_\_\_ years old [RANGE = 1 – AGE AT Q270]

**BASE: HAVE BEEN TOLD THEY HAVE UC**

**Q608** Have you ever had a colectomy (surgical removal of all or part of your colon)?

Yes [TERMINATE]

No

**BASE: HAVE BEEN TOLD THEY HAVE UC**

**Q615** Which health care professionals, if any, do you currently see to manage your UC? When thinking about managing your UC, please include all health care professionals involved in helping you live with and treat the symptoms of your UC, such as managing your medication, treating the inflammation of your colon, etc. Please select all that apply.

[MULTIPLE RESPONSE; RANDOMIZE]

Primary care physician/General practitioner [IF US/Internist]

Gastroenterologist

Rheumatologist

Dermatologist

Internist with gastroenterology focus

Nurse

Nurse practitioner/Physician's assistant in a gastroenterologist's office

Nurse practitioner/Physician's assistant in another type of practitioner's office

Psychiatrist/Psychologist/Therapist

Nutritionist/Dietician

Colorectal surgeon

Other [ANCHOR]

None [ANCHOR; EXCLUSIVE]

**BASE: HAVE BEEN TOLD THEY HAVE UC**

**Q620** Have you seen a gastroenterologist/internist or another provider at your gastroenterologist's/internist's office or clinic for your UC in the past 12 months? Please select all that apply.

[RANDOMIZE; MULTIPLE RESPONSE]

1. Yes, a gastroenterologist [ANCHOR AT TOP; ROTATE WITH CODE 2]

2. Yes, an internist [ANCHOR AT TOP; ROTATE WITH CODE 1]

3. Yes, a nurse at a gastroenterologist's office

4. Yes, a nurse at an internist's office

5. Yes, a nurse practitioner/physician's assistant at a gastroenterologist's office

6. Yes, a nurse practitioner/physician's assistant at an internist's office

7. Yes, someone else at a gastroenterologist's office [ANCHOR]

8. Yes, someone else at an internist's office [ANCHOR]

9. No [ANCHOR; EXCLUSIVE]

**BASE: HAVE BEEN TO GASTRO'S/INTERNIST'S OFFICE IN PAST 12 MO**

**Q621** In the past 12 months, how many times have you visited your gastroenterologist's/internist's office for your UC? Your best estimate is fine.

\_\_\_\_ times [RANGE = 1-200]

**BASE: HAVE BEEN TO GASTRO'S/INTERNIST'S OFFICE IN PAST 12 MO**

**Q622** Is the gastroenterologist's office you have visited in the past 12 months located in an inflammatory bowel disease (IBD) center/clinic?

Yes

No

Not sure

**BASE: HAVE BEEN TO GASTRO'S/INTERNIST'S OFFICE IN PAST 12 MO**

**Q623** Does the gastroenterologist's office you have visited in the past 12 months have inflammatory bowel disease (IBD)specialized nurse(s)?

Yes

No

Not sure

**BASE: HAVE BEEN TOLD THEY HAVE UC**

**Q625** Please indicate all prescription medications you have ever taken for UC.

[MULTIPLE RESPONSE; RANDOMIZE]

Immunosuppressant (e.g., 6-Mercaptopurine, Azathioprine, Methotrexate)

Anti-TNF biologic (e.g., Adalimumab (Humira), Golimumab (Simponi), Infliximab (Remicade, Inflectra))

Other biologic (e.g., Vedolizumab (Entyvio))

5-ASA (e.g., Salofalk, Pentasa, Asacol, Mezavant, Asalazine, Cronezil, Mesalazine)

Corticosteroid (e.g., Prednisone, Medrol, Budecort, Budenofalk)

Another prescription medication for UC [ANCHOR]

Not sure [ANCHOR; EXCLUSIVE] [TERMINATE]

I have never taken any prescription medications for my UC. [ANCHOR; EXCLUSIVE] [TERMINATE]

[TERMINATE IF ONLY 5-ASA IS SELECTED]

**BASE: HAVE EVER TAKEN A PRESCRIPTION DRUG**  
**Q630** Please indicate all prescription medications you are currently taking for UC.

[SHOW ONLY MEDICATIONS SELECTED AT Q625 IN SAME ORDER]

Another prescription medication for UC [ANCHOR]

7. Not sure [ANCHOR; EXCLUSIVE]

8. I am not currently taking any prescription medications for my UC. [ANCHOR; EXCLUSIVE]

**BASE: HAVE EVER TAKEN CORTICOSTEROID TREATMENT**

**Q635** You indicated that you have taken a corticosteroid for your UC. In the **past 12 months**, for approximately how many months have you taken **corticosteroids** for your UC?

|\_|\_| MONTHS [RANGE: 0-12]

[IF HAVE EVER TAKEN 5-ASA (BUT NOT IMMUNOSUPPRESSANT OR BIOLOGIC) MUST ALSO HAVE TAKEN STEROIDS FOR THEIR UC IN THE PAST 12 MONTHS. MILD PATIENTS=1-3 MONTHS OF STEROIDS IN THE PAST 12 MONTHS; MODERATE TO SEVERE PATIENTS 4+ MONTHS]

**BASE: CURRENTLY TAKING BIOLOGIC TREATMENT**

**Q636** You indicated that you have taken a biologic for your UC. Is the healthcare provider who prescribes your biologic treatment the provider who is mostly responsible for managing your UC?

1. Yes
2. No
3. Not sure

**BASE: HAVE BEEN TOLD THEY HAVE UC**

**Q640** We will be asking you some questions about you and your health, in order to provide the basis of our research. All your responses will remain completely confidential and the research adheres to the Data Protection Act, Market Research Society, Association of the British Pharmaceutical Industry, and international code of marketing and social research practice.

We are not attempting to promote anything to you or to influence you. You have the right to withdraw from the survey at any time while completing the survey.

This survey is being conducted by an independent market research agency, on behalf of a pharmaceutical company, and is for market research purposes only. The pharmaceutical company sponsoring the research is not a recipient of your personal data and, thus, did not have and shall not have any access to your personal data. The pharmaceutical company sponsoring the research will only receive anonymized results which will not be used to support measures or decisions regarding you.

We are also being asked to pass on to our clients the details of side effects or product issues that are mentioned

during the course of market research interviews and surveys. Although this is an on-line market research survey and what you say will, of course, be treated in confidence, should you raise a side effect or product issue with certain medications, we will need to report this even if it has already been reported by you directly to your physician or the regulatory authorities. In this situation, the sponsoring pharmaceutical company will only use your data to comply with its own safety legal duties. In such a situation you will be asked whether or not you are willing to waive the confidentiality given to you under the Market Research Codes of Conduct specifically in relation to that side effect or product issue.

Everything else you say during the course of the survey will continue to remain confidential, and you will still have the option to remain anonymous if you so wish.

Are you willing to proceed with the survey on this basis?

Yes

No [TERMINATE]

**Qualified Respondents will be...**

- Resident of country of focus
- Age 18+ (Q280/18+)
- Diagnosed with UC (Q600/12)
- Managed by a gastroenterologist and have been to their GI's office in the last 12 months (Q620=1-4)
- Have had a colonoscopy or flexible sigmoidoscopy to confirm their diagnosis (Q610=1)
- Have ever taken any prescription medication for their UC (Q625=1-6) except for only EVER taken 5-ASA (Q625=4)
- Agree to AE statement (Q640/1)
- Have not had a colectomy (Q608/1)

The treatment question (Q625) will also be used to define severity in this research. We are currently defining respondents as follows:

- Mild: Have ever taken 5-ASA and steroids (Q625/4 & 5) and have been on steroids for 1-3 months within the past 12 months(Q635/1-3) Not to exceed 20% of total sample in each country
- Moderate to Severe: Have ever taken Immunosuppressant or Biologic (Q625/1 or 2 or 3) **or** have ever taken 5-ASA and steroids (Q625/4 & 5) and have been on steroids for greater than 3 months within the past 12 months (Q635/4+)

**Survey Begins Here**

**BASE: ALL RESPONDENTS**

**Q398** Next, we have a few employment and economic questions.

**Q399**

Yes

No

Are you employed full time for pay with an organization or company?

Are you employed part time for pay with an organization or company?  
Are you self-employed full time?  
Are you self-employed part time?

**BASE: NOT AT ALL EMPLOYED**

**Q402** Which of the following best describes your current situation?  
Looking for work  
Not looking for work  
Unable to work due to a disability or illness

**BASE: ASK SEQUENTIAL EMPLOYMENT**

**Q404** Do any of the following describe you? Please select all that apply.  
[MULTIPLE RESPONSE]  
Retired  
A student  
A stay-at-home spouse or partner  
None of these E

**BASE: ALL RESPONDENTS**

**Q410** Which one of the following best describes your employment status?  
[ONLY SHOW ITEMS SELECTED AT Q398-Q404]  
Employed full time  
Employed part time  
Self-employed full time

15. Self-employed part time  
Not employed, but looking for work  
Not employed and not looking for work  
Not employed, unable to work due to a disability or illness  
Retired  
Student  
Stay-at-home spouse or partner

**BASE: ALL RESPONDENTS**

**Q1305** How many children are you the parent or guardian of?  
|\_| children [RANGE 0-15]

---

**SECTION 700: CURRENT UC EXPERIENCE**

---

[PN: SHOW Q705 AND Q710 ON THE SAME PAGE]

**BASE: ALL QUALIFIED RESPONDENTS**

**Q705** How many times do you go to the bathroom for any reason, including to pass stool, air, or mucus, on your **best day**? Please think of a 24-hour period.  
*Please do not include trips to the bathroom only to urinate.*  
Your best estimate is fine.  
[RANGE: 0 – 100]  
|\_|\_|\_| times

**BASE: ALL QUALIFIED RESPONDENTS**

**Q710** How many times do you go to the bathroom for any reason, including to pass stool, air, or mucus, on your **worst day**? Please think of a 24-hour period.

*Please do not include trips to the bathroom only to urinate.*  
Your best estimate is fine.  
[RANGE: 0 – 100]  
|\_|\_|\_| times

**BASE: ALL QUALIFIED RESPONDENTS**

**Q715** What is important to you in managing your UC?  
Please select all that apply. [Q705 in UC HCP Survey]

[MULTIPLE RESPONSE; RANDOMIZE]

Be able to conduct daily activities  
Be able to exercise  
Have my disease controlled with alternative medicine  
Prevent the need for injections or infusions  
Reduce my risk of cancer  
Reduce my fatigue  
Work more often/consistently [EMPLOYEES ONLY]  
Attend school more often/consistently [STUDENTS ONLY]  
Avoid colectomy (surgical removal of all or part of your colon) or ostomy  
Have less impact on familial or social relationships  
Be able to eat whatever I would like without symptoms  
Reduced the need for prescription medications  
Avoid hospitalization  
Be able to manage the psychological impacts of the disease (e.g., anxiety, depression, etc.)  
Have less impact on sex life and personal relationships  
Avoid toileting accidents, or the need to prepare for toileting accidents  
Heal my mucosa (i.e., intestinal mucous membrane)  
Be able to control my pain (e.g., abdominal, joint, etc.)  
Be able to travel (for work or pleasure)  
Minimizing or avoiding side effects from medication  
96. Other [ANCHOR]  
97. Nothing is important to me in managing my UC [ANCHOR; EXCLUSIVE]

**BASE: ALL QUALIFIED RESPONDENTS**

**Q720** In general when thinking about managing your UC, which of the following, if any, are your top 3 worries because of your UC? Please select up to three.

[ALLOW UP TO THREE; RANDOMIZE]

1. That my UC might get worse
2. That my UC might cause other health problems
3. About side effects I may experience from my prescription UC medication(s)
4. That I will not be able to get access to all available medications [HOLD WITH CODE 13]
5. How my UC impacts my personal relationships
6. How my UC impacts my career/education
7. The potential of needing a colectomy or ostomy in the future
8. The potential of passing UC on to my [IF Q1305=0: future] children
9. The potential risk for developing cancer
10. That I may not be able to travel (for work or pleasure)
11. Other [ANCHOR]

12. None – I do not worry about anything because of my UC. [ANCHOR; EXCLUSIVE]  
 13. That I will not be able to afford medications [HOLD WITH CODE 4]

**BASE: ALL QUALIFIED RESPONDENTS**

**Q725** How much do you agree or disagree with each of the following statements about the overall impact of UC on your life?

**Q726**

- Strongly disagree
- Somewhat disagree
- Somewhat agree
- Strongly agree

[RANDOMIZE]

- I often feel like I spend more time in the bathroom than anywhere else
- I feel like I would be a more successful person if I did not have UC
- I worry I will pass my UC to my [future] children
- UC has made me more appreciative of the important things in life
- UC has made me more resilient
- I feel comfortable discussing my health issues with my family/friends
- UC is mentally exhausting
- I feel that UC controls my life, rather than me controlling the disease

---

**SECTION 800: EVERYDAY LIVING**

---

**BASE: ALL QUALIFIED RESPONDENTS**

**Q805** Which of the following emotions, if any, do you typically experience during a UC flare? Please select all that apply.

[MULTIPLE RESPONSE; RANDOMIZE]

- I am a lot more angry in general
- I feel guilty for missing events
- I feel lonely
- I feel less confident
- I am restless
- I feel scared
- I feel hopeless
- I feel ashamed
- I feel more fatigued
- I feel isolated
- I feel embarrassed

None of these are true for me during a flare [ANCHOR; EXCLUSIVE]

**BASE: ALL QUALIFIED RESPONDENTS**

**Q816** Do you currently consider your UC to be in remission?

*When we say remission we mean that your disease is controlled with few to no symptoms.*

- Yes
- No

**BASE: ALL QUALIFIED RESPONDENTS**

**Q810** How many separate UC flares have you had in the past 12 months? If you are not sure, please provide your best estimate.

*When we say flare we mean a period of time where you experience a dramatic increase in symptoms that is different than what you typically experience.*

[RANGE: 0-100]

||| flares in the past 12 months

**BASE: HAVE HAD FLARE IN PAST 12 MONTHS**

**Q815** Thinking of your most recent UC flare, how long did the flare last? If you are not sure, please provide your best estimate.

- Less than one week
- 7-14 Days
- 15-30 Days
- 1- 2 Months
- 3 months or greater

---

**SECTION 900: SOCIAL IMPACT OF UC**

---

**BASE: ALL QUALIFIED RESPONDENTS**

**Q900** In the past 12 months, about how many of the following events, if any, have you missed due to your UC? Your best estimate is fine.

[RANDOMIZE; BUT KEEP ITEMS 2-3 AND 4-5 TOGETHER]

[RANGE: 0-200]

My child's events (e.g., parent-teacher conferences, sporting events, plays, etc.) [HAVE CHILDREN ONLY] |||

Days of work due to disease/symptoms [EMPLOYED ONLY] |||

Days of work due to treatment or medical appointments (e.g., infusion appointments) [EMPLOYED ONLY] |||

Days of school due to disease/symptoms [STUDENTS ONLY] |||

Days of school due to treatment (e.g., infusion appointments) [STUDENTS ONLY] |||

Social events (e.g., weddings, parties, bat/bar mitzvah, dinner with friends, movies, etc.) |||

Travel plans (work or pleasure) |||

**BASE: ALL QUALIFIED RESPONDENTS**

**Q905** Have you done any of the following as a result of your UC? Please select all that apply.

[MULTIPLE RESPONSE; RANDOMIZE]

- Left a job
- Took disability from my job
- Took time off from my job due to my disease/symptoms (not disability) [HOLD BELOW CODE 2]
- Took time off from my job due to treatment (e.g., infusion appointments) (not disability) [HOLD BELOW CODE 3]
- Retired from work completely
- Switched jobs
- Lost a job
- Selected a specific industry or career, other than what I initially wanted
- Made special arrangements/accommodations at work
- Delayed continuing or finishing my education
- Made special arrangements/accommodations at school

Mapped bathrooms at my workplace/on my commute  
97. None of these [ANCHOR; EXCLUSIVE]

**BASE: ALL QUALIFIED RESPONDENTS**

**Q910** Have you done any of the following as a result of your UC? Please select all that apply.

[MULTIPLE RESPONSE; RANDOMIZE]

Postponed having children

Decided not to have children/not to have any more children  
Postponed, ended, or avoided marriage/romantic relationships

Decided to adopt children

Stopped treatment in order to start a family

97. None of these [ANCHOR; EXCLUSIVE]

**BASE: EMPLOYED RESPONDENTS**

**Q915** How much do you agree or disagree with each of the following statements about the impact of UC on work?

**Q916**

Strongly disagree

Somewhat disagree

Somewhat agree

Strongly agree

[RANDOMIZE]

My UC has had a negative effect on my confidence at work

I am too tired because of my UC to excel in my workplace

I feel comfortable discussing my health issues in my workplace

My employer is very understanding of my condition

I am in too much pain or distracted by the daily needs of my disease to focus on my work

I have not told my employer about my UC because I fear the repercussions

Managing my UC has made me better at managing my workload

---

**SECTION 1000: RELATIONSHIP AND COMMUNICATION WITH GASTRO**

---

**BASE: ALL QUALIFIED RESPONDENTS (Q99/1)**

**Q1000** Have you ever...? Please select all that apply.

[MULTIPLE RESPONSE; RANDOMIZE BUT KEEP 1-2 TOGETHER]

Participated in a support group that meets in-person

Participated in a support group online (e.g., social media, chat rooms, formal support groups, etc.)

Participated in a peer mentoring program

Reached out to a patient association or organization (i.e., organizations that provide information and support to, and lobby on behalf of, patients and their families, such as [IF US, INSERT: the Crohn's Colitis Foundation])

Relied on information from a patient association or organization or support group to help you make choices about treatment and disease management

Participated in education program about my UC

Been referred to a patient association or organization by my gastroenterologist

None of these ANCHOR; E

**BASE: INTERACTED WITH PATIENT ASSOCIATION (Q1000/4, 5, 7)**

**Q1001** How much do you agree or disagree with the following statement?

*I wish I knew about patient associations or organizations earlier.*

Strongly disagree

Somewhat disagree

Somewhat agree

Strongly agree

**BASE: ALL QUALIFIED RESPONDENTS (Q99/1)**

**Q1002** What information, if any, would you be interested in receiving from a patient association or organization? Please select all that apply.

[MULTIPLE RESPONSE; RANDOMIZE]

Treatment options

Affordability of treatment, including ways to receive financial assistance [US AND CANADA ONLY]

Research initiatives

Clinical trials

How to live better with UC

How to talk to my spouse/partner about my UC

How to talk to my gastroenterologist about my UC

How to prepare for visits with my gastroenterologist

How to know if my medications are working

Other

None, I am not interested in receiving information from a patient association or organization

**BASE: PATIENTS CURRENTLY TAKING BIOLOGICS AND WHO SEE MULTIPLE HCP'S FOR THEIR UC**

**Q1047** Earlier, you mentioned that you currently see multiple healthcare providers to manage your UC. Who do you primarily communicate with about each of the following aspects of your UC?

**Q1048**

1. The healthcare provider who prescribes your biologic treatment

2. Another healthcare provider

3. Not applicable

[RANDOMIZE]

1. Emotional impacts

2. Symptoms

3. Side effects of treatment

4. Treatment

5. Your quality of life

**BASE: ALL QUALIFIED RESPONDENTS**

**Q1049** As a reminder, for the remainder of the survey, please continue to think about the gastroenterologist mostly responsible for managing your UC.

**BASE: ALL QUALIFIED RESPONDENTS (Q99/1)**

**Q1010** Have you set goals for managing your UC with your gastroenterologist?

*When we say goals, please think of what is important to you in managing your UC.*

- Yes
- No

**BASE: ALL QUALIFIED RESPONDENTS**

**Q1015** How satisfied are you with the communication you have with your gastroenterologist regarding your UC? [Q1010 in UC HCP Survey]

- Very dissatisfied
- Somewhat dissatisfied
- Somewhat satisfied
- Very satisfied

**BASE: ALL QUALIFIED RESPONDENTS**

**Q1020** How satisfied are you with each of the following aspects for how you are managing your UC with your gastroenterologist?

**Q1021**

- Very dissatisfied
- Somewhat dissatisfied
- Somewhat satisfied
- Very satisfied

[MULTIPLE RESPONSE; RANDOMIZE]

- Discussion of how my current medication may help reach my long-term treatment goals
- Discussion of how my current medication may help reach my day-to-day goals (e.g., go out with friends)
- Discussion of all my prescription medication options, including benefits and side effects
- Discussion of the possibility that my disease can be controlled with few to no symptoms
- Information about upcoming procedures (e.g., day-of schedule, recovery time, any long term side effects, etc.)
- Expectations set around my medication regimen (e.g., how to know if it is working, signs a medication change is necessary, etc.)
- Willingness to discuss alternative therapies (e.g., acupuncture, natural remedies, etc.) despite lack of medical evidence to support efficacy
- Discussion of mental/emotional health impacts of UC
- Expectations set around the long-term realities of living with a chronic and unpredictable disease
- Discussion of symptoms experienced
- Discussion of how treatment modality (i.e., injection, infusion, oral) impacts my quality of life
- Discussion of how I can get more support and information on my condition

**BASE: ALL QUALIFIED RESPONDENTS**

**Q1025** How well do you feel that your gastroenterologist has explained each of the following aspects of managing your UC to you?

**Q1026**

- Has explained very well
- Has explained somewhat well

Could explain somewhat better

Could explain much better

[MULTIPLE RESPONSE; RANDOMIZE, BUT ROTATE 1-2, 3-4 TOGETHER]

Lifestyle changes (e.g., diet, exercise)

My current UC status/whether my UC has become better or worse

Potential risk factors for cancer

The benefits and risks of biologics on in the disease

How inflammation relates to my UC

The importance of getting my inflammation under control, regardless of current symptoms

What will happen if my UC treatment fails

The hereditary nature of UC

The importance of keeping up to date on health maintenance (e.g., vaccinations, examinations, colon cancer surveillance, etc.)

How to access information and support from patient associations or organizations

**BASE: ALL QUALIFIED RESPONDENTS**

**Q1030** Which of the following topics related to your UC, if any, do you feel are the most important to prioritize during a routine appointment with your gastroenterologist? Please select up to three. [Q1015 in UC HCP Survey]

[SELECT UP TO THREE; RANDOMIZE]

The emotional impacts of UC [HOLD WITH CODE 3]

The physical impacts of UC [HOLD WITH CODE 2]

The impacts of UC on sex life and personal relationships

How to control inflammation

What to expect next from my UC treatment, including possible changes in my treatment

New medications that are available for UC

Side effects of current treatment

Symptoms/problems experienced since my last visit

What to expect from my UC long-term

If I could get cancer

My ability to afford my medications [US ONLY]

My ability to manage my fatigue

My ability to manage my symptoms

Where to go for additional information and support

Other [ANCHOR]

None [ANCHOR; EXCLUSIVE]

**BASE: ALL QUALIFIED RESPONDENTS**

**Q1035** With respect to your communication with the gastroenterologist mostly responsible for managing your UC, how much do you agree or disagree with each of the following statements?

**Q1036**

Strongly disagree

Somewhat disagree

Somewhat agree

Strongly agree

I often regret not telling my gastroenterologist more during my visits.

I wish my gastroenterologist had discussed all available treatment options earlier, so I had a better idea of my choices. [Q1000 in UC HCP Survey]

My gastroenterologist rarely has time to address all of my questions and concerns. [Q1000 in UC HCP Survey]

I wish my gastroenterologist and I talked more about my goals for managing my UC. [Q725 in UC HCP Survey]

I feel comfortable raising concerns and fears with my gastroenterologist. [Q1000 in UC HCP Survey]

I don't feel comfortable talking to my gastroenterologist about emotional concerns [Q1000 in UC HCP Survey]

I don't feel comfortable talking to my gastroenterologist about sex life and personal relationship concerns [Q1000 in UC HCP Survey]

I wish my gastroenterologist and I talked more about my fears of medical treatments. [Q725 in UC HCP Survey]

I am hesitant to tell my gastroenterologist if I don't take my medication exactly as prescribed

I am honest with my gastroenterologist when discussing my experiences with UC [Q725 in UC HCP Survey]

I wish I had more time at appointments with my gastroenterologist [Q725 in UC HCP Survey]

**BASE: ALL QUALIFIED RESPONDENTS**

**Q1040** Which of the following, if any, do you wish your gastroenterologist better understood about your experiences living with UC? Please select all that apply.

[MULTIPLE RESPONSE; RANDOMIZE]

How it affects my mental health

How much I rely on him/her to help me with my UC

The inconvenience of my medications

The stress it causes me and my loved ones

That I would like to manage my UC with my diet

How my disease affects my relationships

How much UC impacts my quality of life

How difficult it is for me to keep a job

How difficult it is for me to stay in school

The importance of not becoming dependent on pain medications

The importance of not becoming dependent on steroids

How exhausted I am

The abdominal pain I experience

How difficult it is for me to afford my medications [SUPPRESS IN EUROPE]

That I would like to talk to others who have UC

That I would like more information about UC and support

How my disease affects my sex life

Other [ANCHOR]

None [ANCHOR; EXCLUSIVE]

**BASE: ALL QUALIFIED RESPONDENTS**

**Q104** With respect to your communication with the gastroenterologist mostly responsible for managing your UC, how much do you agree or disagree with each of the following statements?

**Q1046**

Strongly disagree

Somewhat disagree

Somewhat agree

Strongly agree

[RANDOMIZE]

When I leave an appointment with my gastroenterologist, I know exactly how to follow his/her treatment recommendations

I worry that, if I ask too many questions, my gastroenterologist will see me as a difficult patient and it will affect the quality of care I receive

I feel that my gastroenterologist is prescribing the very best available medication for my unique set of symptoms and lifestyle issues

Other healthcare providers in my gastroenterologist's office (e.g., nurses, physician assistants, etc.) play a strong role in educating me on treatments and lifestyle adjustments

My gastroenterologist and I work together to make decisions about my UC treatment plan

---

#### SECTION 1100: TREATMENT ATTITUDES AND EXPERIENCES

---

**BASE: ALL QUALIFIED RESPONDENTS**

**Q1100** How many times, if any, have you been hospitalized for your UC in the past 12 months?

*When thinking of hospitalizations please think of all times you have been to the hospital, including trips to the emergency room, being admitted to the hospital, etc.*

[MANDATORY OPEN END NUMERIC]

|\_|\_| times in the past 12 months [RANGE 0-365]

**BASE: ALL QUALIFIED RESPONDENTS**

**Q1105** How satisfied are you with your current UC medications? [Q1100 in UC HCP Survey]

Very dissatisfied

Somewhat dissatisfied

Somewhat satisfied

Very satisfied

**BASE: SATISFIED WITH CURRENT UC TREATMENT**

**Q1110** You mentioned you are satisfied with your UC medications, for which of the following reasons are you satisfied? Please select all that apply.

*Please think of all medications you are taking for your UC.*

[MULTIPLE RESPONSE; RANDOMIZE]

The minimal number of side effects [HOLD WITH CODE 2]

The minimal severity of side effects [HOLD WITH CODE 1]  
I have fewer stools

I have less frequent flares

The frequency of doses

I experience less abdominal pain

The cost of the medications

Fatigue is decreasing

I like the mode of administration (i.e., injection, infusion, oral)

I experience less urgency to go to the bathroom

Other [ANCHOR]



**BASE: NOT SATISFIED WITH CURRENT UC TREATMENT**

**Q1115** You mentioned you are not satisfied with your UC medications, for which of the following reasons are you not satisfied? Please select all that apply.

[MULTIPLE RESPONSE; RANDOMIZE]

The number of side effects [HOLD WITH CODE 2]

The severity of side effects [HOLD WITH CODE 1]

I have frequent stools

I still have frequent flares

The frequency of doses

I experience more abdominal pain

The cost of the medications

Fatigue is increasing

I do not like the mode of administration (i.e., injection, infusion, oral)

I experience more urgency to go to the bathroom

Other [ANCHOR]

**BASE: ALL QUALIFIED RESPONDENTS**

**Q1120** How much do you agree or disagree with each of the following statements?

**Q1121**

Strongly disagree

Somewhat disagree

Somewhat agree

Strongly agree

[RANDOMIZE]

I wish I had more medication choices to treat my UC

I wish I had moved to biologics sooner than I did [CURRENTLY ON BIOLOGICS ONLY] [Q1000 in UC HCP Survey]

I am not happy with biologics [CURRENTLY ON BIOLOGICS ONLY]

I believe the benefit of biologics (medication taken through injection or infusion) outweighs the risks (e.g., side effects)

If my treatment makes me feel good enough, I don't see a need to consider other treatment options, even if they might make me feel even better

It is possible for a UC medication to give me back my old life (i.e., before I was diagnosed with UC)

I am afraid if I go off steroids, I will immediately have a UC flare [CURRENTLY ON STERIODS ONLY]

I wish I knew more about all the available medications for UC when I was first diagnosed

I wish I knew where to find information and support when I was first diagnosed with UC

Patient associations or organizations are important to the management of my UC [Q1000 in UC HCP Survey]

**BASE: ALL QUALIFIED RESPONDENTS**

**Q1125** Which of the following methods of medication administration would you prefer, assuming they were all equally effective? Please only select one.

[SINGLE RESPONSE; RANDOMIZE]

Oral

Injection in medical facility [HOLD WITH CODE 3]

Self-injection [HOLD WITH CODE 2]

Infusion

No preference [ANCHOR]

**BASE: ALL QUALIFIED RESPONDENTS**

**Q1130** As far as you know, are the following statements about UC treatment true or false, or are you not at all sure? [Q805 in UC HCP Survey]. **If you are interested, we can provide you with the correct answers at the end of the survey.**

**Q1131**

True

False

Not sure

[RANDOMIZE]

If my UC symptoms are under control there is not active disease or inflammation [FALSE]

It is important to keep my disease under control to reduce long-term complications [TRUE]

Uncontrolled inflammation is a risk factor for colorectal cancer [TRUE]

UC may be associated with other conditions outside of my colon [TRUE]

It is okay to stop taking UC medications once you feel better [FALSE]

It is okay to use steroids as a long term maintenance medication [FALSE]

It is possible for your body to stop responding to biologics, causing the medication to no longer work [TRUE]

---

## SECTION 1200: FEELINGS TOWARDS CHANGES IN MEDICATION REGIMEN

---

**BASE: ALL QUALIFIED RESPONDENTS**

**Q1205** When thinking about your UC medication(s), what are the top three indicators that it is time to consider changing or adding medications? Please select up to three. [Q1200 in UC HCP Survey]

[SELECT UP TO THREE; RANDOMIZE]

Having continued symptoms

Having to adjust the dose multiple times

Being unable to do the things I want to do

Having continued flares

Making additional visits to my gastroenterologist or other health care professional

Having to stop taking a medication because I cannot tolerate the side effects

Inability to go to work consistently [HOLD WITH CODE 10]

Inability to go to school consistently [HOLD WITH CODE 9]

Needing to go to the hospital or emergency room unexpectedly

Frequently needing to call my gastroenterologist's office to express concerns or ask questions

My joints start to bother me

The cost of medications/changes in affordability

Changes in availability of medications

- Experienced increased urgency and frequency of stools
- Unable to tolerate the mode of administration (i.e., oral, injectable, infusion)
- Missing too much work or school to get my medicine
- Current medicine is too inconvenient
- Hearing from someone else about a different medication option
- Desire to have children
- 96. Other [ANCHOR]
- 97. None [ANCHOR, EXCLUSIVE]

**BASE: GI HAS RECOMMENDED CHANGE IN MED REGIMEN (Q1200/1-3)**

**Q1220** For which of the following reasons, if any, have you been reluctant when your gastroenterologist has recommended or made a change in your medication regimen? Please select all that apply. [Q1210 in UC HCP Survey]

[MULTIPLE RESPONSE; RANDOMIZE]

- I was worried about the side effects from the new medication
- I was afraid that the new medication would not be any better
- I could not afford the medications my gastroenterologist recommended
- I didn't like the way the new treatment would be administered (e.g., infusion vs. injection vs. oral medication, etc.)
- I thought my current medication was treating my UC well enough
- My insurance makes it difficult to change medications
- I was afraid of the long-term risks
- I was afraid of the possibility of experiencing fertility issues in the future
- I did not understand why they were recommending the change
- The change was mandated by my health care system
- I was worried about getting and managing pregnancy
- 96. Some other reason [ANCHOR]
- 97. I have never felt reluctant when my gastroenterologist has recommended a change in medication [ANCHOR; EXCLUSIVE]

**ANSWERS TO TRUE/FALSE QUESTIONS**

**QXXXX** Earlier in this survey, you responded to several true/false questions. Please see below for the correct answers to these questions.

1. If my UC symptoms are under control, there is not active disease or inflammation
  - a. The answer is FALSE. Even if UC symptoms are under control, there may still be active disease or inflammation.
2. It is important to keep my disease under control to reduce long-term complications
  - a. The answer is TRUE. It is important to keep UC under control to reduce long-term complications.
3. Uncontrolled inflammation is a risk factor for colorectal cancer
  - a. The answer is TRUE. Uncontrolled inflammation is a risk factor for colorectal cancer.

4. UC may be associated with other conditions outside of my colon
  - a. The answer is TRUE. UC may be associated with other conditions outside of the colon
5. It is okay to stop taking UC medications once you feel better
  - a. The answer is FALSE. Even if you feel better, you should always consult your physician or healthcare provider before you stop taking UC medications.
6. It is okay to use steroids as long-term maintenance medication
  - a. The answer is FALSE. Steroids should not be used as long-term maintenance medication.
7. It is possible for your body to stop responding to biologics, causing the medication to no longer work
  - a. The answer is TRUE. It is possible for your body to stop responding to biologics, causing the medication to no longer work.

---

**SECTION: DEMOGRAPHICS**

---

**BASE: ALL RESPONDENTS**

**Q462** Which of the following income categories best describes your total [INSERT LAST YEAR] household income before taxes?

- 178. Less than €5.000
- 179. €5.000 - €9.999
- 180. €10.000 - €19.999
- 181. €20.000 - €29.999
- 182. €30.000 - €39.999
- 183. €40.000 - €49.999
- 184. €50.000 - €74.999
- 185. €75.000 - €99.999
- 186. €100.000 - €149.999
- 187. €150.000 - €199.000
- 188. €200.000 or more
- 9994. Decline to answer

[r99] Unknown

**BASE: ALL RESPONDENTS (Q280/18+ AND Q640/NE2 AND Q639/NE2)**

**Q364** What is your marital status?

1. Never married
2. Married or civil union
3. Divorced
4. Separated
5. Widow/Widower
6. Living with partner

**BASE: ALL QUALIFIED FINLAND RESPONDENTS AND (dmCntry/75) AND Q640/NE2 AND Q639/NE2)**

**QFIREG** In which region do you currently reside?

Choice:

- [ch1] Attica (Athens)
- [ch2] Central Greece
- [ch3] Central Macedonia
- [ch4] Crete
- [ch5] East Macedonia, Thrace
- [ch6] Epirus

- [ch7] Ionian Islands
- [ch8] Southern Aegean Sea
- [ch9] Peloponnese
- [ch10] Northern Aegean Sea
- [ch11] Thessaly
- [ch12] Western Greece
- [ch13] Western Macedonia

- [ch42] Canada
- [ch48] China
- [ch75] Finland
- [ch76] France
- [ch85] Germany
- [ch89] Greece
- [ch116] India
- [ch120] Ireland
- [ch123] Italy
- [ch126] Japan
- [ch157] Mexico
- [ch196] Russian Federation
- [ch214] South Korea
- [ch215] Spain
- [ch223] Sweden
- [ch224] Switzerland
- [ch243] United Kingdom
- [ch244] United States of America
- [ch996] Other country

---

**SURVEY CLOSE - DISCLAIMER**

---

[DISPLAY Q1230 BEFORE END SCREEN BUT AFTER ALL DEMOS]

**BASE: ALL QUALIFIED RESPONDENTS EX US (dmCntry/NE244)**

**Q1230** Thank you for your participation in this survey! Throughout the survey there were many topics addressed that may or may not have applied to you. If you have any questions or concerns, please talk to your doctor or healthcare professional.

**Supplementary material 2**

UC Narrative Physicians Survey  
GREECE

---

**SECTION 600: SCREENER**

---

**BASE: ALL RESPONDENTS**

**Q8625** Thank you for agreeing to take this survey. Our first few questions are for classification purposes, and they enable us to select the questions to ask you later in the survey. They will also help us properly analyze responses to this survey. As you may already know, we never disclose the identity of any individual. Your answers will always be kept strictly confidential. We report results only for groups of people, not for individuals.

What is your primary medical specialty?

[RANDOMIZE]

- 18. Cardiovascular Diseases [TERMINATE]
- 32. Colon & Rectal Surgery [TERMINATE]
- 39. Dermatology [TERMINATE]
- 51. Gastroenterology
- 153. Rheumatology [TERMINATE]
- 173. Family Practice/General Practice [IF US:/Internal Medicine] [TERMINATE]
- 96. Other specialty ANCHOR [TERMINATE]
- 97. Unspecified specialty ANCHOR [TERMINATE]

**BASE: GASTROENTEROLOGISTS AND OTHER QUALIFYING SPECIALTIES**

**Q8732** In what country is your practice located? If you practice in more than one country, please select the primary country in which you practice.

Choice:

- [ch14] Australia
- [ch33] Brazil

**BASE: GASTROENTEROLOGISTS AND OTHER QUALIFYING SPECIALTIES**

**Q628** How many years have you been in your specialty practice?

[RANGE 0-100]

|\_|\_| years

**BASE: GASTROENTEROLOGISTS AND OTHER QUALIFYING SPECIALTIES**

**Q8716** Which of the following best describes your medical practice?

1. Mostly office- or clinic-based
2. Mostly hospital- or lab-based
3. Exclusively hospital- or lab-based
4. Mostly long-term care facility-based [TERMINATE]
5. Mostly hospice-based [TERMINATE]
6. Equally hospital-based and office/clinic-based
96. Other [TERMINATE]

**BASE: GASTROENTEROLOGISTS AND OTHER QUALIFYING SPECIALTIES**

**Q655** Do you currently practice in an IBD center/clinic?

Yes

No

**BASE: GASTROENTEROLOGISTS AND OTHER QUALIFYING SPECIALTIES**

**Q657** Does your practice offer patients multidisciplinary care at one location?

1. Yes

2. No

**BASE: GASTROENTEROLOGISTS AND OTHER QUALIFYING SPECIALTIES**

**Q656** Does your primary medical practice have IBD specialized nurse(s)?

Yes

No

**BASE: GASTROENTEROLOGISTS AND OTHER QUALIFYING SPECIALTIES**

**Q630** Approximately how many unique adult patients (ages 18 and older) do you see in your practice each month who have the following conditions? For each condition, please think about all of the patients you see or treat per month. If you are not sure, please provide your best estimate.

**Q631**

[RANDOMIZE] [RANGE: 0-1000]

1. Ulcerative colitis |\_|\_|\_| patients [TERMINATE IF LESS THAN 10]
2. Irritable bowel syndrome |\_|\_|\_| patients
3. Crohn's disease |\_|\_|\_| patients
4. Celiac disease |\_|\_|\_| patients

**BASE: GASTROENTEROLOGISTS AND OTHER QUALIFYING SPECIALTIES WHO SEE UC PATIENTS**

**Q645** Approximately what proportion of your ulcerative colitis (UC) patients are currently being treated by the following types of prescription medications? Your best estimate is fine.

As patients may be on multiple therapies for their UC, the sum of these proportions may exceed 100%.

[RANGE 0-100]

Immunosuppressant (e.g., 6-Mercaptopurine, Azathioprine, Methotrexate) |\_|\_|\_|%

Anti-TNF biologic (e.g., Adalimumab (Humira), Golimumab (Simponi), Infliximab (Remicade, Inflectra)) |\_|\_|\_|% [TERMINATE IF 2+3 LESS THAN 10%]

Other biologic (e.g., Vedolizumab (Entyvio)) |\_|\_|\_|% [TERMINATE IF 2+3 LESS THAN 10%]

5-ASA (e.g., Salofalk, Pentasa, Asacol, Mezavant, Asalazine, Cronezil, Mesalazine)) |\_|\_|\_|%

Corticosteroid (e.g., Prednisone, Medrol, Budecort, Budenofalk) |\_|\_|\_|%

Other |\_|\_|\_|%

Not currently taking prescription medication |\_|\_|\_|% [MUST SUM TO AT LEAST 100%]

**BASE: GASTROENTEROLOGISTS AND OTHER QUALIFYING SPECIALTIES WHO SEE UC PATIENTS**

**Q646** Do you **personally** initiate biologic treatment in your ulcerative colitis patients?

1. Yes
2. No

**BASE: GASTROENTEROLOGISTS AND OTHER QUALIFYING SPECIALTIES**

**Q650** This research is conducted on behalf of a pharmaceutical company. The pharmaceutical company is not a recipient of your personal data and, thus, did not have and shall have no access to your personal data. The pharmaceutical company shall only receive anonymized results which shall not be used to support measures or decisions

regarding you. This online questionnaire will be conducted in accordance with the Data Protection Act, Market Research Society, Association of the British Pharmaceutical Industry, and British Healthcare Business Intelligence Association guidelines.

Although this is an on-line market research survey and what you say will, of course, be treated in confidence, should you raise an adverse event in a specific patient or group of patients, we will need to report this even if it has already been reported by you directly to the company or the regulatory authorities [IF UK (Q8732/243) INSERT: using the MHRA's 'Yellow Card' system]. In such a situation, you will be asked whether or not you are willing to waive the confidentiality given to you under the Market Research Codes of Conduct specifically in relation to that adverse event.

Everything else you say during the course of the survey will continue to remain confidential, and you will still have the option to remain anonymous if you so wish.

Are you willing to proceed with the survey on this basis?

1. Yes
2. No [TERMINATE]

**Qualified respondents will be:**

- Resident of country of focus
- Specialize in Gastroenterology [varies by country as needed- outlined above]
- Not practicing in a long-term care facility or hospice (Q8716/4 or 5)
- See at least 10 UC patients in the past month
- At least 10% of patients are taking a biologic
- Agree to AE statement (Q650/1)

**SECTION 700: Communication with Patients**

**BASE: ALL QUALIFIED RESPONDENTS (Q99/1)**

**Q700** You indicated that you have seen [INSERT RESPONSE FROM Q630/1] UC patients in the past month.

When answering the remaining questions in the survey, please think about your experiences treating patients in your practice whose UC is moderate to severe. By this, we mean patients who have ever taken more prescription medications than just 5-ASA to control their UC.

Please think of the patients you treat in the country where you consider your primary practice to be located.

**BASE: ALL QUALIFIED RESPONDENTS**

**Q701** Approximately what proportion of your patients with moderate to severe UC are in the following age groups? Your best estimate is fine.

[RANGE: 0-100, SUM MUST EQUAL 100]

- Under age 18 |\_|\_|\_|%
- Age 18-24 |\_|\_|\_|%
- Age 25-34 |\_|\_|\_|%
- Age 35-44 |\_|\_|\_|%
- Age 45-64 |\_|\_|\_|%
- Age 65+ |\_|\_|\_|%

**BASE: ALL QUALIFIED RESPONDENTS**

**Q705** Based on what your patients tell you, what is important in managing their moderate to severe UC? Please select all that apply. [Q715 in UC Patient Survey]

[MULTIPLE RESPONSE; RANDOMIZE]

Be able to conduct daily activities

Be able to exercise

Have their disease controlled with alternative medicine

Prevent the need for injections or infusions

Reduce their risk of cancer

Reduce their fatigue

Attend school or work more often/consistently

Avoid colectomy or ostomy

Have less impact on familial or social relationships

Be able to eat whatever they would like without symptoms

Reduce the need for prescription medications

Avoid hospitalization

Be able to manage the psychological impacts of the disease (e.g., anxiety, depression, etc.)

Have less impact on sex life and personal relationships

Avoid toileting accidents, or the need to prepare for toileting accidents

Heal their mucosa

Be able to control their pain (e.g., abdominal, joint, etc.)

Be able to travel (for work or pleasure)

Minimizing or avoiding side effects from medication

Other [ANCHOR]

None [ANCHOR; EXCLUSIVE]

**BASE: ALL QUALIFIED RESPONDENTS**

**Q710** Which of the following aspects, if any, do you discuss with your patients with moderate to severe UC? Please select all that apply.

[MULTIPLE RESPONSE; RANDOMIZE]

The impact of UC on patients' job/career/education or ability to attend work/school

The impact of UC on patients' mental/emotional health

The impact of UC on patients' ability to conceive (i.e., get pregnant)/father a child

Whether or not patients seek treatment from other healthcare professionals (e.g., primary care physician, physician assistant, internist, psychologist, [IF JAPAN (Q8732/126), INSERT: nurse; ALL OTHERS INSERT: nurse/nurse practitioner], pharmacist, dietitian etc.)

Patients' ability to afford their medication(s) [SUPPRESS IN FRANCE]

Patients' ability to adhere to their prescribed medication regimen

Patients' preference on medication type

The impact of UC on patients' sex life and personal relationships

Patients' ability to manage flares

Whether or not the patient has adequate support from family and friends

Patients' lifestyle goals for managing their UC (e.g., participate in a hobby, be able to travel)

Whether or not patients are interested in or should seek out complementary alternative treatments (e.g., XXX)

The difficulties my patients have in communicating aspects of their disease to those around them

The benefits and risks of treatment options

Patients' concerns about medication side effects

The information and support patient associations or organizations can provide

96. Other ANCHOR

97. None ANCHOR; E

**BASE: ALL QUALIFIED RESPONDENTS**

**Q715** When do you typically discuss each of the following with your patients with moderate to severe UC?

**Q716** [DISPLAY HORIZONTALLY]

Only at diagnosis/initial consultation

Only when making a change in medication

When the patient asks/initiates the discussion

On a regular basis as part of managing UC

At every visit

7. Not sure

**BASE: ALL QUALIFIED RESPONDENTS**

**Q720** Based on your conversations with your patients with moderate to severe UC, which of the following, if any, are your patients' top 3 worries because of their UC? [Q720 in UC Patient Survey]

[ALLOW UP TO THREE; RANDOMIZE]

That their UC might get worse

That their UC might cause other long-term health problems

The side effects they may experience from their prescription UC medication(s)

That they will not be able to get access to all available medications

How UC impacts their personal relationships

How UC impacts their career/education

The potential of needing a colectomy or ostomy in the future

The potential of passing UC on to their future children

The potential risk for developing cancer

That they may not be able to travel (for work or pleasure)

Other [ANCHOR]

None – my patients do not worry about anything because of their UC. [ANCHOR]

Not sure [ANCHOR]

That they will not be able to afford their medications

**BASE: ALL QUALIFIED RESPONDENTS**

**Q725** With respect to your communication with your patients with moderate to severe UC, how much do you agree or disagree with each of the following statements?

**Q726** [DISPLAY HORIZONTALLY]

Strongly disagree

Somewhat disagree

Somewhat agree

Strongly agree

[RANDOMIZE]

I wish my UC patients and I talked more about their UC treatment goals. [Q1035 in UC Patient Survey]

My patients understand their disease and the treatment options available.

I wish my patients understood the damage that long-term inflammation can have.

My patients are honest with me when discussing their experiences with UC. [Q1035 in UC Patient Survey]

I have taken steps to improve my communication skills with my patients (e.g., attended seminars, taken training courses, etc.). [SUPPRESS IN FRANCE]

I wish there was a way my patients could communicate with me more frequently while experiencing symptoms in between visits.

I wish my patients and I talked more about their fears of medical treatments. [Q1035 in UC Patient Survey]

I wish I had more time at appointments with my UC patients [Q1035 in UC Patient Survey]

I wish I had access to an IBD nurse to help me manage UC patients at my practice

Strongly disagree

Somewhat disagree

Somewhat agree

Strongly agree

[RANDOMIZE]

UC patients who are involved in making treatment decisions tend to be more satisfied with their treatment experience than those who are not as involved.

UC patients often settle for a treatment that makes them feel “good enough” even though their disease is active or not well-controlled.

I wish my patients would talk to me before they stopped their medications.

I wish I had more time to discuss all available treatments earlier, so my patients had a better idea of their choices.

**Q1035 in UC Patient Survey]**

I wish I moved more than half of my patients who are currently taking biologics to biologic therapy earlier than I did. (Prescribe biologics [all US respondents]).

More than half of my current biologic patients wish they had moved to biologic therapy sooner than they did. (Prescribe biologics [all US respondents]).

My patients are comfortable being on steroids as long as they feel better.

More than half of my patients take their prescriptions exactly as prescribed.

**Q1002** How much do you agree or disagree with each of the following statements? Please continue to think about your experiences treating patients in your practice who have moderate to severe UC.

**Q1002** [DISPLAY HORIZONTALLY]

1. Strongly disagree
2. Somewhat disagree
3. Somewhat agree
4. Strongly agree

---

### SECTION 800: Resources and Support

---

**BASE: ALL QUALIFIED RESPONDENTS (Q99/1)**

**Q800** What proportion of your patients with moderate to severe UC do you recommend patient associations or organizations to as a source for information and support?

[RANGE 0-100]

|-|-|-|

**BASE: ALL QUALIFIED RESPONDENTS**

**Q805** How well do you think your patients with moderate to severe UC understand each of the following aspects of UC? [Q1130 in UC Patient Survey]

**Q806**

Not at all

Not very well

Somewhat well

Very well

[RANDOMIZE]

1. Even if their UC symptoms are under control, they can still have active disease or inflammation.
2. It is important to keep their disease under control to reduce long-term complications.
3. Uncontrolled inflammation is a risk factor for colorectal cancer.
4. UC may be associated with other conditions outside their colon.
5. It is important to continue taking UC medications, even if they are feeling better.
6. Steroids should not be used as a long-term maintenance medication.
7. It is possible for their body to stop responding to biologics, causing the medication to no longer work.

---

### SECTION 1000: General Treatment Perspective

---

**BASE: ALL QUALIFIED RESPONDENTS**

**Q1000** How much do you agree or disagree with each of the following statements? Please continue to think about your experiences treating patients in your practice who have moderate to severe UC.

**Q1001** [DISPLAY HORIZONTALLY]

[RANDOMIZE]

1. I rarely have time to address all of my UC patients' questions and concerns.
2. My patients feel comfortable raising concerns and fears with me.
3. I spend time discussing my patients' diet with them.
4. My patients feel comfortable talking to me about their emotional concerns.
5. My patients don't feel comfortable talking to me about their sex lives and personal relationship concerns.
6. Patient associations or organizations are important to the management of UC.
7. I wish there were resources I could refer my patients to for information and support.
8. More than half of my patients have requested cheaper medication alternatives.
9. My patients would prefer an effective oral medication over an injectable one if given the choice.

**BASE: ALL QUALIFIED RESPONDENTS**

**Q1005** How much do you agree or disagree with each of the following statements? Please continue to think about your experiences treating patients with moderate to severe UC in your practice.

**Q1006** [DISPLAY HORIZONTALLY]

- Strongly disagree
- Somewhat disagree
- Somewhat agree
- Strongly agree

[RANDOMIZE]

- More than half of UC patients believe that pain and cramping are just part of living with UC
- More than half of UC patients believe that spending significant time in the bathroom is just part of living with UC.
- More than half of my UC patients have accepted that having UC means that they have to settle for a reduced quality of life.
- My patients would approach their career or education differently if they did not have UC.
- My patients would approach their personal relationships differently if they did not have UC.
- More than half of UC patients believe that urgency in going to the bathroom is just part of living with UC.

**BASE: ALL QUALIFIED RESPONDENTS**

**Q1010** What proportion of your patients with moderate to severe UC do you feel are satisfied with the communication they have with you regarding their UC? Your best estimate is fine. [Q1015 in UC Patient Survey]

[RANGE 0-100] [SUM MUST =100]  
Very dissatisfied | | | | %  
Somewhat dissatisfied | | | | %  
Somewhat satisfied | | | | %  
Very satisfied | | | | %

**BASE: ALL QUALIFIED RESPONDENTS**

**Q1015** Which of the following topics, if any, do you feel are the most important to prioritize during a routine appointment with your patients with moderate to severe UC? Please select up to three. [Q1030 in UC Patient Survey]

- [SELECT UP TO THREE; RANDOMIZE]
- The emotional impacts of UC [HOLD WITH CODE 3]
  - The physical impacts of UC [HOLD WITH CODE 2]
  - The impacts of UC on sex life and personal relationships
  - How to control inflammation
  - What to expect next from their UC treatment, including possible changes in treatment
  - New medications that are available for UC
  - Side effects of current treatment
  - Symptoms experienced since their last visit
  - What to expect from their UC long-term
  - If they could get cancer

- Their ability to afford their medications
- Their ability to manage fatigue
- Their ability to manage symptoms
- Where to go for information and support
- Other [ANCHOR]
- None [ANCHOR; EXCLUSIVE]

**BASE: ALL QUALIFIED RESPONDENTS**

**Q1020** In thinking about your patients with moderate to severe UC, which of the following, if any, would help to improve your patient relationships? Please select all that apply. [Q1050 in the patient study]

[MULTIPLE RESPONSE; RANDOMIZE BUT KEEP 1 & 2, 3& 4 TOGETHER]

- More frequent visits
- Longer visits
- More information about UC in general to give to my patients
- More information about the UC treatment options that are available to give to my patients
- More tools to help my patients prepare for their visits with me (e.g., list of questions to ask, informative brochures)
- Clarity on their personal treatment goals and whether or not they are meeting them
- Discussion of whether or not they take their medication(s) exactly as prescribed
- An online tool or smartphone application to better monitor and track their activities and symptoms
- Advice on where to get reliable information to help them manage their disease
- A list of other health care professionals in my area (e.g., psychologists, nutritionists, IBD nurse, rheumatologist, dermatologist) to which I could refer my patients to aid in UC treatment
- The ability to refer my patients to chronic disease management classes
- A tool explaining the mechanics of how UC actually works
- Other methods of communication (e.g., telephone, video conversations, email, etc.)
- Better access to colonoscopies
- Having informed resources to provide to my patients
- Having an IBD nurse to help with management
- 96. Other ANCHOR
- 97. Nothing would help improve my patient relationships ANCHOR, E

---

**SECTION 1100: General Medication**

---

**BASE: ALL QUALIFIED RESPONDENTS**

**Q1100** What proportion of your patients with moderate to severe UC do you feel are satisfied with their current medications? Your best estimate is fine. [Q1105 in UC Patient Survey]

[RANGE 0-100] [SUM MUST =100]  
Very dissatisfied | | | | %  
Somewhat dissatisfied | | | | %  
Somewhat satisfied | | | | %  
Very satisfied | | | | %

**BASE: ALL QUALIFIED RESPONDENTS**

**Q1105** Turning your attention to medication specifically, which of the following do you typically do to determine if your patients are satisfied with their medication regimen? Please continue to think about your experiences treating patients with moderate to severe UC in your practice. Please select all that apply.

[MULTIPLE RESPONSE; RANDOMIZE]

I wait for the patient to tell me if they are satisfied or not.

I ask the patient directly if they are satisfied or not.

I ask the patient if they are experiencing any side effects.

I ask the patient how their medication regimen impacts various aspects of their personal life.

I ask the patient if they are satisfied with the mode of administration (i.e., orally vs. injection vs. infusion).

I ask the patient how they feel before and after initiating the medication.

Based on the symptoms patients describe

I ask them if they are taking their medications as prescribed

I ask the patient if they are satisfied with the frequency of administration.

96. Other ANCHOR

97. Nothing ANCHOR; E

**BASE: ALL QUALIFIED RESPONDENTS**

**Q1110** Approximately what proportion of your patients with moderate to severe UC do you feel are well controlled with few to no symptoms by their current UC medication regimen? Please provide your best estimate.

[RANGE: 0 – 100]

|\_|\_|\_|%

---

### SECTION 1200: Changes in medication regimen

---

**BASE: ALL QUALIFIED RESPONDENTS**

**Q1200** When thinking about the UC medications that are currently available, what are the **top three** things patients tell you that indicate that it is time to consider changing medications? Please select up to three. [Q1205 in UC Patient Survey]

[SELECT UP TO THREE; RANDOMIZE]

1. The patient is having continued symptoms
2. Having to adjust the dose multiple times
3. The patient is unable to do the things they want to do
4. The patient is having continued flares
5. The patient is needing to make additional visits to [Q149/1:myself] [Q149/2: you] or another health care professional
6. The patient is having to stop taking a medication because they cannot tolerate the side effects
7. The patient is unable to go to work or school consistently
8. The patient is needing to go to the hospital or emergency room unexpectedly
9. The patient frequently is calling the office to express concerns or ask questions
10. The patient's joints are starting to bother them

11. The cost of medications/changes in affordability
12. There are changes in availability of medications
13. The patient experiences increased urgency and frequency of stools
14. The patient is unable to tolerate the mode of administration (i.e., oral, injectable, infusion)
15. The patient is missing too much work or school to get their medicine
16. The current medicine is too inconvenient
17. The patient hears from someone else about a different medication option
18. The patient desires to have children
96. Other [ANCHOR]
97. None [ANCHOR, EXCLUSIVE]

**BASE: HAVE EVER RECOMMENDED CHANGE**

**Q1210** For which of the following reasons, if any, have your patients with moderate to severe UC been reluctant when you recommend or make a change in their medication regimen? Please select all that apply. [Q1220 in UC Patient Survey]

[MULTIPLE RESPONSE; RANDOMIZE]

- They were worried about the side effects from the new medication
- They were afraid that the new medication would not be any better
- The medications were expensive
- They didn't like the way the new treatment would be administered (e.g., infusion vs. injection vs. oral medication, etc.)
- They thought their current medication was treating their UC well enough
- Their insurance makes it difficult to change medications [SUPPRESS IN CANADA, FINLAND]
- They were afraid of the long-term risks
- They were afraid of the possibility of experiencing fertility issues in the future
- They did not understand why I recommended the change
- The change was mandated by the health care system
- They were worried about getting pregnant and managing pregnancy
96. Some other reason [ANCHOR]
97. My patients never feel reluctant when I recommend a change in medication [ANCHOR; EXCLUSIVE]

**BASE: BIO-PRESCRIBING HCPS**

**Q1215** To what extent, if any, would each of the following make you hesitate to prescribe patients with moderate to severe UC an **anti-TNF biologic therapy?**

*Examples of anti-TNF biologics include: Adalimumab (Humira), Golimumab (Simponi), Infliximab (Remicade, Inflectra).*

**Q1216** Would hesitate, but would not prevent me from initiating new treatment

Would hesitate and would prevent me from initiating new treatment

Would not hesitate because of this



[MULTIPLE RESPONSE; RANDOMIZE]

Concerns about the side effects of these medications  
Fear of the potential long-term risks  
Feeling the patient is doing well enough on their current medication [HOLD WITH CODE 4]  
Feeling the patient is controlled on their current medication [HOLD WITH CODE 3]  
Patients may decline to move to anti-TNF biologic therapy  
I would want more information about the medication before initiating new treatment  
The possible financial burden on the patient  
Not covered by their health care plan/insurance  
The impact of UC on patients' ability to conceive (i.e., get pregnant)/father a child

**BASE: BIO-PRESCRIBING HCPS**

**Q1220** To what extent, if any, would each of the following make you hesitate to prescribe patients with moderate to severe UC an **anti-integrin biologic therapy**?

*Examples of an anti-integrin biologic include vedolizumab (Entyvio).*

**Q1221** Would hesitate, but would not prevent me from initiating new treatment

Would hesitate and would prevent me from initiating new treatment

Would not hesitate because of this

[MULTIPLE RESPONSE; RANDOMIZE]

Concerns about the side effects of these medications  
Afraid of the potential long-term risks  
Feeling the patient is doing well enough on their current medication [HOLD WITH CODE 4]  
Feeling the patient is controlled on their current medication [HOLD WITH CODE 3]  
Patients may decline to move to anti-integrin biologic therapy  
I would want more information about the medication before initiating new treatment  
The possible financial burden on the patient  
Not covered by their health care plan/insurance  
The impact of UC on patients' ability to conceive (i.e., get pregnant)/father a child

**BASE: DO NOT PERSONALLY PRESCRIBE BIOLOGICS**

**Q1222** Earlier you mentioned that you do not personally initiate biologic treatment for your UC patients. Do you ever discuss biologic treatment with your UC patients?

Yes

No

**Q1300.** Have you completed a fellowship in IBD?

1. Yes

2. No

**Q8702.** Are you..?

1. Male

2. Female

**Q8705.** Age

**Q8710.** In what year did you graduate from medical school?

**Q8712.** In what year did you complete your residency?

**Q8719.** How would you describe your office or clinic?

1. Private office

2. Private clinic or medical team of the same specialty (2 or more doctors)

3. Private clinic or medical team of different specialties (2 or more doctors)

**Q8722.** On average, how many patients do you see in a typical week? If you are not sure, your best estimate will do.

**Q8725.** Which of the following best describes the ages of your patient population?

1. Age ≤ 18 (pediatrics)

2. Age 19 - 64 (adults)

3. Age ≥ 19 (adults and elderly)

4. Age ≥ 65 (elderly)

5. All ages

**Q8728.** On average, about how many prescriptions do you write (or medications do you dispense) in a week? If you are not sure, your best estimate will do.
